# Supplementary material for: Protonation states at different pH, conformational changes and impact of glycosylation in synapsin Ia
Source: Royal Society of Chemistry journal article supplement (doi:10.1039/d1cp00531f), 2021-01-01
Supplement: d1cp00531f5.pdf [file d1cp00531f5.pdf]

## Supplementary Material

Table 1S. The composition of synapsin I as predicted by SOPMA server.

| <i>Amino acids</i> | <i>Number</i> | <i>%</i> |
|--------------------|---------------|----------|
| Ala                | 72            | 10.2%    |
| Arg                | 39            | 5.5%     |
| Asn                | 20            | 2.8%     |
| Asp                | 28            | 4.0%     |
| Cys                | 3             | 0.4%     |
| Gln                | 59            | 8.4%     |
| Glu                | 20            | 2.8%     |
| Gly                | 75            | 10.6%    |
| His                | 17            | 2.4%     |
| Ile                | 19            | 2.7%     |
| Leu                | 42            | 6.0%     |
| Lys                | 31            | 4.4%     |
| Met                | 14            | 2.0%     |
| Phe                | 19            | 2.7%     |
| Pro                | 98            | 13.9%    |
| Ser                | 60            | 8.5%     |
| Thr                | 32            | 4.5%     |
| Trp                | 4             | 0.6%     |
| Tyr                | 13            | 1.8%     |
| Val                | 40            | 5.7%     |

Table 2S: The percentage of secondary structure elements.

|                 |         |
|-----------------|---------|
| Alpha Helix     | 27.23 % |
| Extended strand | 8.09%   |
| Beta Turn       | 4.68%   |
| Random coil     | 60.00%  |

Table 3S: Ramachandran plots statistics of SynIa model generated via MOE, SWISS Model and I-TASSER.

| Residues                                      | MOE   | SWISS Model | I-TASSER |
|-----------------------------------------------|-------|-------------|----------|
| In most favored regions                       | 92.3% | 94%         | 66.6%    |
| In additionally allowed regions               | 7.6%  | 4.8%        | 26.%     |
| In generously allowed regions                 | 0.0%  | 1.1%        | 5.3%     |
| In disallowed regions                         | 0.2%  | 0.0%        | 1.9%     |
| Number of non-glycine and non proline residue | 100%  | 100%        | 100%     |
| End-residues                                  |       |             |          |
| Glycine residues                              |       |             |          |
| Proline residues                              |       |             |          |
| Total number of residues                      | 610   | 610         | 705      |

Table 4S: Details of Secondary structure elements of the homology model of SynIa.

| Domains                                                         | Description Secondary Structure                                                                                                                                                                                    |
|-----------------------------------------------------------------|--------------------------------------------------------------------------------------------------------------------------------------------------------------------------------------------------------------------|
| Domain A                                                        | Beta Sheets: 24-26                                                                                                                                                                                                 |
|                                                                 | Coil Region: 1-23                                                                                                                                                                                                  |
| Domain B<br>(Linker Domain)                                     | Alpha Helices: 34-37; 58-61; 74-87                                                                                                                                                                                 |
|                                                                 | Beta Sheets: 101-103                                                                                                                                                                                               |
|                                                                 | Coil Region: 27-33; 38-57; 62-73; 88-100; 104-111                                                                                                                                                                  |
| Domain C<br>(Synaptic- Vesicles<br>and Actin-Binding<br>Domain) | Alpha Helices: 127-130; 199-207; 216-222; 225-239; 285- 299;<br>351-365; 399-416                                                                                                                                   |
|                                                                 | Beta Sheets: 112-119; 141-147; 149-156; 161-169; 173-179; 182-<br>185; 256-257; 250-252; 266-269; 279-282; 301- 306; 310-319; 322-<br>331; 342-347; 369-376; 382-388                                               |
|                                                                 | Coil Region: 119-126; 131-140; 157-160; 170-172;<br>180-181; 185-199; 206-215; 223-226; 240- 249; 253-255; 258-265;<br>270-278; 283-284; 298-300; 307-309; 320-321; 330-341; 348-350;<br>365-368; 377-381; 389-398 |
| Domain D<br>(Pro-Rich Linker<br>Domain)                         | Alpha Helices: 488-490; 517-519; 523-529                                                                                                                                                                           |
|                                                                 | Beta Sheets: 421-423; 480-482                                                                                                                                                                                      |
|                                                                 | Coil Region: 417-420; 424-479; 481-487; 550-516; 520-522; 530-<br>659                                                                                                                                              |
| Domain E                                                        | Alpha Helices: 660-668                                                                                                                                                                                             |
|                                                                 | Coil Region: 669-705                                                                                                                                                                                               |

**Table 5S:** List the amino acids and their corresponding protonation states that changed between pHs.

| <b>Amino Acids</b> | <b>pH 6.0 (pka)</b> | <b>pH 7.0 (pka)</b> | <b>pH 7.4 (pka)</b> | <b>pH 8.0 (pka)</b> |
|--------------------|---------------------|---------------------|---------------------|---------------------|
| Asp10              | 3.83                | 3.65                | 4.67                | 4.55                |
| Asp24              | 8.25                | 4.45                | 7.19                | 7.06                |
| Asp120             | 5.54                | 4.08                | 5.6                 | 5.71                |
| Asp125             | 6.49                | 3.95                | 4.67                | 6.1                 |
| Asp140             | 7.56                | 3.48                | 6.37                | 3.3                 |
| Asp150             | 7.37                | 4.61                | 9.67                | 8.19                |
| Asp164             | 7.32                | 4.44                | 4.9                 | 4.79                |
| Asp181             | 5.39                | 3.4                 | 5.93                | 5.1                 |
| Asp197             | 4.34                | 2.24                | 4                   | 3.64                |
| Asp224             | 7.54                | 5.15                | 7.04                | 7.83                |
| Asp248             | 8.82                | 4.04                | 7.73                | 4.56                |
| Asp290             | 8.37                | 4.3                 | 7.41                | 7.97                |
| Asp309             | 6.57                | 2.9                 | 5.05                | 5.21                |
| Asp313             | 3.57                | 4.86                | 5.49                | 4.16                |
| Asp351             | 4.19                | 2.75                | 7.53                | 6.35                |
| Asp358             | 6.03                | 4.43                | 4.77                | 7.33                |
| Asp368             | 5.01                | 2.05                | 3.96                | 4.43                |
| Asp379             | 5.01                | 3.96                | 6.43                | 6.26                |
| Asp382             | 7.18                | 2.37                | 4.55                | 4.4                 |
| Asp397             | 6.77                | 3.93                | 6.43                | 7.41                |
| Asp400             | 6.91                | 2.07                | 7.25                | 5.29                |
| Asp402             | 3.8                 | 3.1                 | 3.66                | 3.04                |
| Asp425             | 4.66                | 3.25                | 7.26                | 5.56                |
| Asp643             | 6.7                 | 3.79                | 5.13                | 6.51                |
| Asp685             | 5.94                | 3.84                | 7.45                | 5.26                |
| Asp705             | 8.42                | 2.94                | 6.51                | 3.61                |
| Glu52              | 5.9                 | 3.57                | 8.12                | 8.3                 |
| Glu97              | 6.46                | 4.64                | 6.99                | 8.36                |
| Glu121             | 9.47                | 5.06                | 8.99                | 8.62                |
| Glu138             | 5.56                | 3.46                | 7.36                | 6.67                |
| Glu144             | 4.67                | 2.58                | 4.39                | 5.53                |
| Glu147             | 11.3                | 5.55                | 9.21                | 11.02               |
| Glu66              | 5.37                | 2.61                | 5.03                | 6.15                |
| Glu242             | 7.12                | 4.44                | 7.61                | 7.07                |

|        |       |       |       |       |
|--------|-------|-------|-------|-------|
| Glu243 | 7.82  | 4.65  | 9.37  | 8.33  |
| Glu257 | 6.73  | 4.53  | 7.3   | 8.06  |
| Glu305 | 5.55  | 5.05  | 5.36  | 4.28  |
| Glu345 | 7.78  | 4.65  | 7.45  | 6.98  |
| Glu362 | 5.51  | 5.15  | 8.28  | 8.35  |
| Glu373 | 7.77  | 6.7   | 8.35  | 7.67  |
| Glu386 | 4.85  | 2.41  | 2.43  | 5.3   |
| Glu401 | 7.5   | 3.67  | 6.11  | 8.41  |
| Glu408 | 6.42  | 4.69  | 4.97  | 4.78  |
| Glu674 | 7.14  | 4.74  | 6.28  | 5.48  |
| Glu686 | 7.18  | 4.68  | 6.41  | 7.72  |
| Glu690 | 690   | 5.62  | 5.12  | 7.36  |
| Tyr323 | 11.4  | 14.96 | 15.58 | 8.1   |
| Hsd236 | 20    | 20    | 20    | 20    |
| Hsd383 | 20    | 20    | 20    | 20    |
| Cys223 | 13.29 | 12.69 | 13.03 | 13.16 |
| Cys360 | 13.62 | 13.18 | 13.58 | 13.49 |
| Cys370 | 11.86 | 11.76 | 12.08 | 11.53 |
| Tyr3   | 11.97 | 11.76 | 10.69 | 12.06 |
| Tyr21  | 13.86 | 10.11 | 12.72 | 12.06 |
| Tyr129 | 14.74 | 12.4  | 16.81 | 16.28 |
| Tyr198 | 15.22 | 10.76 | 14.47 | 15.08 |
| Tyr207 | 12.56 | 10.87 | 13.4  | 14.67 |
| Tyr220 | 14.26 | 12.56 | 14.28 | 14.67 |
| Tyr252 | 13.96 | 11.23 | 12.62 | 13.71 |
| Tyr264 | 12.68 | 9.02  | 14.59 | 13.14 |
| Tyr301 | 15.05 | 16.34 | 14.86 | 14.24 |
| Tyr312 | 14.05 | 11.14 | 13.72 | 13.53 |
| Tyr326 | 16.98 | 12.03 | 17.83 | 16.76 |
| Tyr353 | 15.34 | 12.77 | 14.57 | 13.89 |
| Lys85  | 7.23  | 10.2  | 7.92  | 6.8   |
| Lys128 | 8.16  | 11.39 | 8.72  | 8.31  |
| Lys131 | 6.96  | 10.5  | 7.64  | 7.28  |
| Lys133 | 9     | 10.5  | 9.15  | 8.98  |
| Lys134 | 7.44  | 11.13 | 7.37  | 7.65  |
| Lys142 | 9.72  | 10.38 | 6.21  | 9.57  |
| Lys173 | 9.91  | 10.46 | 8.83  | 8.44  |
| Lys179 | 8.87  | 10.38 | 11.23 | 8.96  |
| Lys225 | 8.91  | 9.01  | 9.55  | 8.34  |

|        |       |       |       |       |
|--------|-------|-------|-------|-------|
| Lys237 | 7.38  | 10.42 | 6.71  | 7.09  |
| Lys238 | 8.37  | 10.15 | 7.02  | 8.53  |
| Lys256 | 7.91  | 10.6  | 7.02  | 7.36  |
| Lys269 | 9.88  | 12.65 | 12.41 | 9.95  |
| Lys279 | 6.1   | 10.29 | 7.57  | 7.33  |
| Lys281 | 7.57  | 10.18 | 7.91  | 6.91  |
| Lys299 | 6.1   | 11.37 | 6.76  | 6.95  |
| Lys311 | 7.81  | 10.31 | 6.85  | 7.72  |
| Lys318 | 6.66  | 8.78  | 8.94  | 7.44  |
| Lys324 | 9.63  | 12.8  | 11.55 | 10.4  |
| Lys336 | 5.34  | 9.81  | 5.46  | 6.01  |
| Lys354 | 7.7   | 11.45 | 7.33  | 7.69  |
| Lys378 | 8.17  | 11.31 | 9.15  | 8.95  |
| Lys403 | 6.45  | 9.53  | 6.55  | 6.94  |
| Lys413 | 9.22  | 11.05 | 9.22  | 8.84  |
| Lys576 | 6.02  | 8.87  | 7.29  | 8.93  |
| Lys593 | 5.75  | 10.3  | 6.41  | 5.91  |
| Lys633 | 7.36  | 10.4  | 7.28  | 6.87  |
| Lys639 | 7.75  | 10.41 | 8.95  | 7.63  |
| Lys662 | 8.11  | 10.43 | 8.42  | 6.9   |
| Lys688 | 6.61  | 9.63  | 9     | 7.14  |
| Lys697 | 7.46  | 10.39 | 8.75  | 6.46  |
| Arg5   | 9.76  | 12.39 | 11.97 | 9.22  |
| Arg6   | 10.88 | 12.28 | 11.65 | 10.54 |
| Arg7   | 11.96 | 11.74 | 11.11 | 10.45 |
| Arg27  | 9.58  | 12.32 | 9.61  | 9.33  |
| Arg53  | 9.89  | 10.32 | 8.85  | 10.16 |
| Arg108 | 10.43 | 12.5  | 10.15 | 11.12 |
| Arg114 | 13.6  | 10.84 | 10.76 | 13.77 |
| Arg169 | 9.09  | 12.14 | 9.7   | 9.23  |
| Arg176 | 12.37 | 13.24 | 12.8  | 12.19 |
| Arg186 | 9.89  | 10.49 | 9.92  | 10.46 |
| Arg194 | 10.04 | 12.14 | 9.36  | 9.34  |
| Arg199 | 14.12 | 14.34 | 14.29 | 14.4  |
| Arg234 | 10.13 | 12.1  | 9.81  | 9.14  |
| Arg315 | 10.8  | 10.77 | 10.82 | 10.26 |
| Arg328 | 12.07 | 12.99 | 9.19  | 11.69 |
| Arg352 | 12.56 | 14.03 | 12.5  | 12.72 |
| Arg381 | 11.43 | 12.54 | 9.69  | 10.81 |

|        |       |       |       |       |
|--------|-------|-------|-------|-------|
| Arg420 | 10.05 | 11.88 | 9.01  | 10.32 |
| Arg422 | 11.36 | 13.02 | 9.74  | 9.39  |
| Arg424 | 9.49  | 12.13 | 10.4  | 10.55 |
| Arg446 | 12.34 | 12.09 | 10.65 | 10.79 |
| Arg460 | 9.77  | 12.22 | 10.93 | 8.88  |
| Arg476 | 9.65  | 12.35 | 10.32 | 13.04 |
| Arg484 | 10.09 | 12.18 | 9.87  | 10.12 |
| Arg507 | 9.97  | 11.95 | 9.35  | 9.19  |
| Arg531 | 10.13 | 12.46 | 9.62  | 9.85  |
| Arg534 | 10.54 | 11.96 | 10.44 | 9.87  |
| Arg547 | 10.09 | 12.24 | 9.27  | 8.89  |
| Arg556 | 10.44 | 12.11 | 9.64  | 9.47  |
| Arg587 | 9.73  | 12.18 | 9.65  | 8.89  |
| Arg602 | 9.63  | 12.52 | 10.31 | 8.75  |
| Arg612 | 10.21 | 12.13 | 9.19  | 10.17 |
| Arg622 | 9.17  | 12.26 | 9.82  | 10.03 |
| Arg631 | 7.03  | 12.16 | 10    | 9.5   |
| Arg679 | 9.79  | 12.2  | 9.87  | 10.29 |
| Arg693 | 10.62 | 12.71 | 9.57  | 12.13 |
| Arg696 | 8.79  | 10.48 | 11.66 | 8.89  |
| Arg430 | 11.3  | 12.49 | 10.22 | 10.92 |
| Arg565 | 10.39 | 12.63 | 10.43 | 6.88  |



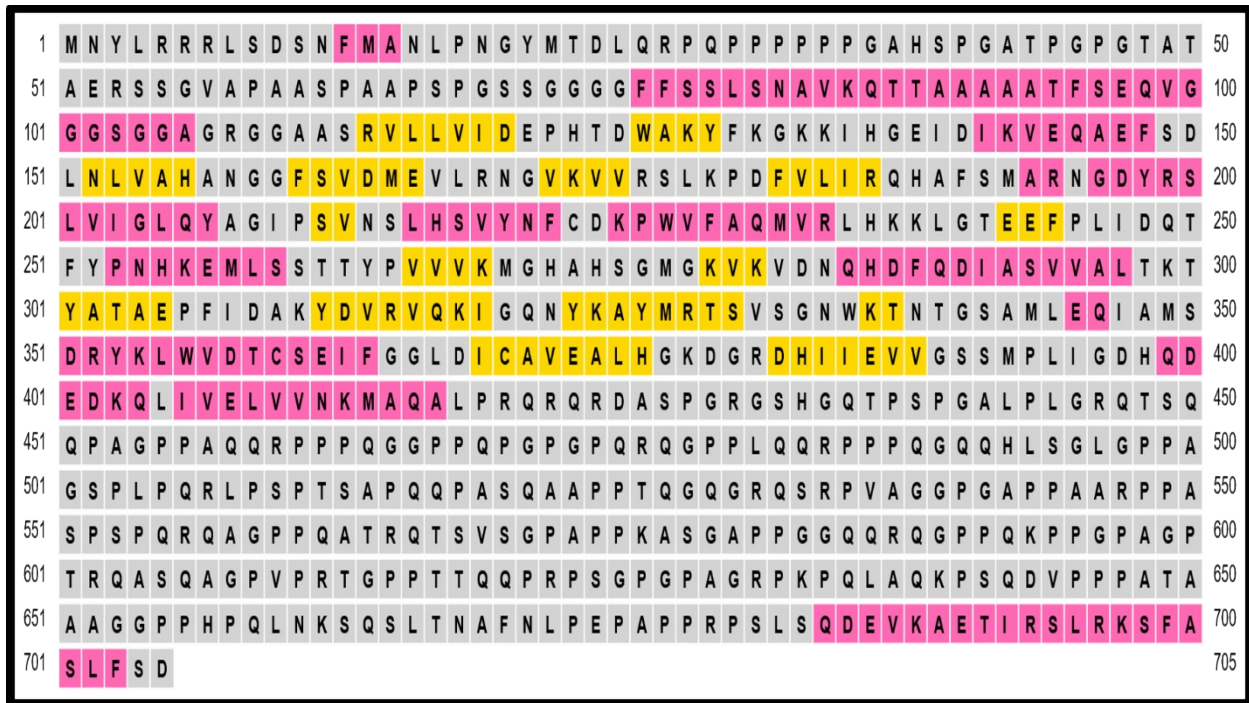

Figure 1S. Secondary structure elements of SynI are displayed in different colours; alpha helices (pink), beta sheets (yellow), loops/coils (grey).
